# Supplementary material for: Progression of atherosclerosis versus arterial stiffness with age within and between arteries in systemic lupus erythematosus
Source: Springer Nature journal article supplement (doi:10.1007/s00296-019-04267-y), 2019-03-16
Supplement: MOESM2 [file 16553794]

**SUPPLEMENTAL mATERIAL**

**progression of atherosclerosis versus arterial stiffness WITH AGE within and between arteries IN SYSTEMIC LUPUS ERYTHEMATOSUS**

Authors.

Paola C. Roldan, M.D

Ernest R. Greene, Ph.D.

Clifford R Qualls, Ph.D.

Wilmer L. Sibbitt Jr, M.D.

Carlos A. Roldan, M.D.

Running title. Roldan-Arterial Disease Within and Between Arteries

**Log-transformation in data analysis.**

Generally, there are three reasons that statisticians give for using log-values of a continuous outcome measure Y in data analysis. In this study, the outcome measure Y is Intima-Media Thickness –IMT and/or Pressure-Strain Elastic Modulus - PSEM. The three reasons are:

1) To make the mean relationship of Y versus a key predictor X (age in this study) linear. This supposes an exponential progression (or decay) of the values of Y over age, so that log(Y) is approximately linear over age.

2) To minimize the influence of outliers and to make the outcome distribution more symmetric - more normally distributed, and

3) To equalize variance of the outcome across the range of the predictor. This supposes the variance (that is, standard deviation - SD) increases with mean of Y. This is a common situation that occurs in data analysis and many statistical procedures (e.g., ANalysis Of VAriance, ANOVA) perform better with equal variances. In linear regression, this takes the form of a constant coefficient of variation (CV = SD/mean) assumption.

For reason 1), the assumption can be check; the scatter plots in Figures 2 and 3 adequately verify the linearity assumption of the log-transformed data for data analysis purposes without claiming this linearity as a physiological finding. The desired results for reasons 2) and 3) are similarly confirmed.

**Use natural log values to estimate percent change in outcomes.**

Linear regression of the natural logarithm of an outcome versus age provides a direct computation of percent change over age. This idea is based on the calculus of derivatives where the differential Δ ln(Y) ≈ ΔY / Y. So, the regression of ln(Y) versus X in years estimates the regression coefficient b, which is a slope of the form b = Δ ln(Y) / ΔX. Here, the ΔX can be 1 year, so then the slope b = Δ ln(Y) ≈ ΔY / Y per year. ΔY / Y is the relative change in Y per year, and 100* ΔY / Y is the annual percent change in Y. If ΔX = 1 decade, we revise our language to be percent change per decade. Note that ΔY can be positive or negative for an increasing or declining Y, respectively. If ΔY = 0, then there is no change and Y is constant.

Another useful property of this statistic is that % changes are unit less quantities and comparable (This annual percent change is analogous to an annual interest rate of a loan. The % changes (interest rates) are unit less quantities and comparable even when beginning differences are present and even when absolute changes differ; this is the idea of the requirement for reporting annual interest rates in financial comparisons – “truth-in-lending laws”).
